# Physical Activity and Step-Count Diary

Week 1

Daily Step-Count goal \_\_\_\_\_

Weekly Step-Count goal \_\_\_\_\_

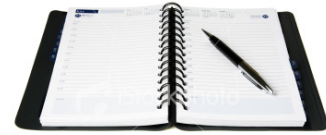

Use this diary to record any physical activities you do this week. This includes **walking** and **other physical activities** (e.g. cycling gardening, swimming, heavy housework, exercise classes etc). Write down the **approximate time** and **how long** you do them for.

|                         |  |  |  |  |  |  |  |
|-------------------------|--|--|--|--|--|--|--|
| <b>Date</b>             |  |  |  |  |  |  |  |
| <b>Day of week</b>      |  |  |  |  |  |  |  |
| <b>Morning</b>          |  |  |  |  |  |  |  |
| <b>Afternoon</b>        |  |  |  |  |  |  |  |
| <b>Evening</b>          |  |  |  |  |  |  |  |
| <b>Daily step-count</b> |  |  |  |  |  |  |  |

Add up the steps from all 7 days to get total weekly step-count:

**Total weekly step-count =** \_\_\_\_\_

Divide the total weekly step-count by 7 to get average daily step-count:

**Average daily step-count =** \_\_\_\_\_

Did I achieve my goal? **Yes:** And my reward was.....

**No / Partly:** What got in the way? .....

# Physical Activity and Step-Count Diary

Week 2

Daily Step-Count goal \_\_\_\_\_

Weekly Step-Count goal \_\_\_\_\_

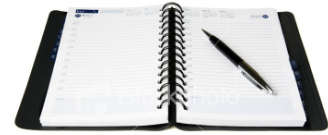

Use this diary to record any physical activities you do this week. This includes **walking** and **other physical activities** (e.g. cycling gardening, swimming, heavy housework, exercise classes etc). Write down the **approximate time** and **how long** you do them for.

|                         |  |  |  |  |  |  |  |
|-------------------------|--|--|--|--|--|--|--|
| <b>Date</b>             |  |  |  |  |  |  |  |
| <b>Day of week</b>      |  |  |  |  |  |  |  |
| <b>Morning</b>          |  |  |  |  |  |  |  |
| <b>Afternoon</b>        |  |  |  |  |  |  |  |
| <b>Evening</b>          |  |  |  |  |  |  |  |
| <b>Daily step-count</b> |  |  |  |  |  |  |  |

Add up the steps from all 7 days to get total weekly step-count:

**Total weekly step-count =** \_\_\_\_\_

Divide the total weekly step-count by 7 to get average daily step-count:

**Average daily step-count =** \_\_\_\_\_

**Did I achieve my goal? Yes: And my reward was**.....

**No / Partly: What got in the way?** .....

# Physical Activity and Step-Count Diary

Week 3

Daily Step-Count goal \_\_\_\_\_

Weekly Step-Count goal \_\_\_\_\_



Use this diary to record any physical activities you do this week. This includes **walking** and **other physical activities** (e.g. cycling gardening, swimming, heavy housework, exercise classes etc). Write down the **approximate time** and **how long** you do them for.

|                         |  |  |  |  |  |  |  |
|-------------------------|--|--|--|--|--|--|--|
| <b>Date</b>             |  |  |  |  |  |  |  |
| <b>Day of week</b>      |  |  |  |  |  |  |  |
| <b>Morning</b>          |  |  |  |  |  |  |  |
| <b>Afternoon</b>        |  |  |  |  |  |  |  |
| <b>Evening</b>          |  |  |  |  |  |  |  |
| <b>Daily step-count</b> |  |  |  |  |  |  |  |

Add up the steps from all 7 days to get total weekly step-count:

**Total weekly step-count =** \_\_\_\_\_

Divide the total weekly step-count by 7 to get average daily step-count:

**Average daily step-count =** \_\_\_\_\_

**Did I achieve my goal? Yes: And my reward was**.....

**No / Partly: What got in the way?** .....

# Physical Activity and Step-Count Diary

Week 4

Daily Step-Count goal \_\_\_\_\_

Weekly Step-Count goal \_\_\_\_\_



Use this diary to record any physical activities you do this week. This includes **walking** and **other physical activities** (e.g. cycling gardening, swimming, heavy housework, exercise classes etc). Write down the **approximate time** and **how long** you do them for.

|                         |  |  |  |  |  |  |  |
|-------------------------|--|--|--|--|--|--|--|
| <b>Date</b>             |  |  |  |  |  |  |  |
| <b>Day of week</b>      |  |  |  |  |  |  |  |
| <b>Morning</b>          |  |  |  |  |  |  |  |
| <b>Afternoon</b>        |  |  |  |  |  |  |  |
| <b>Evening</b>          |  |  |  |  |  |  |  |
| <b>Daily step-count</b> |  |  |  |  |  |  |  |

Add up the steps from all 7 days to get total weekly step-count:

**Total weekly step-count = \_\_\_\_\_**

Divide the total weekly step-count by 7 to get average daily step-count:

**Average daily step-count = \_\_\_\_\_**

Did I achieve my goal? **Yes:** And my reward was.....

**No / Partly:** What got in the way? .....

# Physical Activity and Step-Count Diary

Week 5

Daily Step-Count goal \_\_\_\_\_

Weekly Step-Count goal \_\_\_\_\_



Use this diary to record any physical activities you do this week. This includes **walking** and **other physical activities** (e.g. cycling gardening, swimming, heavy housework, exercise classes etc). Write down the **approximate time** and **how long** you do them for.

|                         |  |  |  |  |  |  |  |
|-------------------------|--|--|--|--|--|--|--|
| <b>Date</b>             |  |  |  |  |  |  |  |
| <b>Day of week</b>      |  |  |  |  |  |  |  |
| <b>Morning</b>          |  |  |  |  |  |  |  |
| <b>Afternoon</b>        |  |  |  |  |  |  |  |
| <b>Evening</b>          |  |  |  |  |  |  |  |
| <b>Daily step-count</b> |  |  |  |  |  |  |  |

Add up the steps from all 7 days to get total weekly step-count:

**Total weekly step-count =** \_\_\_\_\_

Divide the total weekly step-count by 7 to get average daily step-count:

**Average daily step-count =** \_\_\_\_\_

Did I achieve my goal? **Yes:** And my reward was.....

**No / Partly:** What got in the way? .....

# Physical Activity and Step-Count Diary

Week 6

Daily Step-Count goal \_\_\_\_\_

Weekly Step-Count goal \_\_\_\_\_



Use this diary to record any physical activities you do this week. This includes **walking** and **other physical activities** (e.g. cycling gardening, swimming, heavy housework, exercise classes etc). Write down the **approximate time** and **how long** you do them for.

|                         |  |  |  |  |  |  |  |
|-------------------------|--|--|--|--|--|--|--|
| <b>Date</b>             |  |  |  |  |  |  |  |
| <b>Day of week</b>      |  |  |  |  |  |  |  |
| <b>Morning</b>          |  |  |  |  |  |  |  |
| <b>Afternoon</b>        |  |  |  |  |  |  |  |
| <b>Evening</b>          |  |  |  |  |  |  |  |
| <b>Daily step-count</b> |  |  |  |  |  |  |  |

Add up the steps from all 7 days to get total weekly step-count:

**Total weekly step-count =** \_\_\_\_\_

Divide the total weekly step-count by 7 to get average daily step-count:

**Average daily step-count =** \_\_\_\_\_

**Did I achieve my goal?**      **Yes:** And my reward was.....

**No / Partly:** What got in the way? .....

# Physical Activity and Step-Count Diary

Week 7

Daily Step-Count goal \_\_\_\_\_

Weekly Step-Count goal \_\_\_\_\_



Use this diary to record any physical activities you do this week. This includes **walking** and **other physical activities** (e.g. cycling gardening, swimming, heavy housework, exercise classes etc). Write down the **approximate time** and **how long** you do them for.

|                         |  |  |  |  |  |  |  |
|-------------------------|--|--|--|--|--|--|--|
| <b>Date</b>             |  |  |  |  |  |  |  |
| <b>Day of week</b>      |  |  |  |  |  |  |  |
| <b>Morning</b>          |  |  |  |  |  |  |  |
| <b>Afternoon</b>        |  |  |  |  |  |  |  |
| <b>Evening</b>          |  |  |  |  |  |  |  |
| <b>Daily step-count</b> |  |  |  |  |  |  |  |

Add up the steps from all 7 days to get total weekly step-count:

**Total weekly step-count = \_\_\_\_\_**

Divide the total weekly step-count by 7 to get average daily step-count:

**Average daily step-count = \_\_\_\_\_**

Did I achieve my goal? **Yes:** And my reward was.....

**No / Partly:** What got in the way? .....

# Physical Activity and Step-Count Diary

Week 8

Daily Step-Count goal \_\_\_\_\_

Weekly Step-Count goal \_\_\_\_\_



Use this diary to record any physical activities you do this week. This includes **walking** and **other physical activities** (e.g. cycling gardening, swimming, heavy housework, exercise classes etc). Write down the **approximate time** and **how long** you do them for.

|                         |  |  |  |  |  |  |  |
|-------------------------|--|--|--|--|--|--|--|
| <b>Date</b>             |  |  |  |  |  |  |  |
| <b>Day of week</b>      |  |  |  |  |  |  |  |
| <b>Morning</b>          |  |  |  |  |  |  |  |
| <b>Afternoon</b>        |  |  |  |  |  |  |  |
| <b>Evening</b>          |  |  |  |  |  |  |  |
| <b>Daily step-count</b> |  |  |  |  |  |  |  |

Add up the steps from all 7 days to get total weekly step-count:

**Total weekly step-count = \_\_\_\_\_**

Divide the total weekly step-count by 7 to get average daily step-count:

**Average daily step-count = \_\_\_\_\_**

**Did I achieve my goal? Yes: And my reward was.....**

**No / Partly: What got in the way? .....**



# Physical Activity and Step-Count Diary

Week 9

Daily Step-Count goal \_\_\_\_\_

Weekly Step-Count goal \_\_\_\_\_



Use this diary to record any physical activities you do this week. This includes **walking** and **other physical activities** (e.g. cycling gardening, swimming, heavy housework, exercise classes etc). Write down the **approximate time** and **how long** you do them for.

|                         |  |  |  |  |  |  |  |
|-------------------------|--|--|--|--|--|--|--|
| <b>Date</b>             |  |  |  |  |  |  |  |
| <b>Day of week</b>      |  |  |  |  |  |  |  |
| <b>Morning</b>          |  |  |  |  |  |  |  |
| <b>Afternoon</b>        |  |  |  |  |  |  |  |
| <b>Evening</b>          |  |  |  |  |  |  |  |
| <b>Daily step-count</b> |  |  |  |  |  |  |  |

Add up the steps from all 7 days to get total weekly step-count:

**Total weekly step-count = \_\_\_\_\_**

Divide the total weekly step-count by 7 to get average daily step-count:

**Average daily step-count = \_\_\_\_\_**

Did I achieve my goal? **Yes:** And my reward was.....

**No / Partly:** What got in the way? .....

# Physical Activity and Step-Count Diary

Week 10

Daily Step-Count goal \_\_\_\_\_

Weekly Step-Count goal \_\_\_\_\_



Use this diary to record any physical activities you do this week. This includes **walking** and **other physical activities** (e.g. cycling gardening, swimming, heavy housework, exercise classes etc). Write down the **approximate time** and **how long** you do them for.

|                         |  |  |  |  |  |  |  |
|-------------------------|--|--|--|--|--|--|--|
| <b>Date</b>             |  |  |  |  |  |  |  |
| <b>Day of week</b>      |  |  |  |  |  |  |  |
| <b>Morning</b>          |  |  |  |  |  |  |  |
| <b>Afternoon</b>        |  |  |  |  |  |  |  |
| <b>Evening</b>          |  |  |  |  |  |  |  |
| <b>Daily step-count</b> |  |  |  |  |  |  |  |

Add up the steps from all 7 days to get total weekly step-count:

**Total weekly step-count = \_\_\_\_\_**

Divide the total weekly step-count by 7 to get average daily step-count:

**Average daily step-count = \_\_\_\_\_**

Did I achieve my goal? **Yes:** And my reward was.....

**No / Partly:** What got in the way? .....

# Physical Activity and Step-Count Diary

Week 11

Daily Step-Count goal \_\_\_\_\_

Weekly Step-Count goal \_\_\_\_\_



Use this diary to record any physical activities you do this week. This includes **walking** and **other physical activities** (e.g. cycling gardening, swimming, heavy housework, exercise classes etc). Write down the **approximate time** and **how long** you do them for.

|                         |  |  |  |  |  |  |  |
|-------------------------|--|--|--|--|--|--|--|
| <b>Date</b>             |  |  |  |  |  |  |  |
| <b>Day of week</b>      |  |  |  |  |  |  |  |
| <b>Morning</b>          |  |  |  |  |  |  |  |
| <b>Afternoon</b>        |  |  |  |  |  |  |  |
| <b>Evening</b>          |  |  |  |  |  |  |  |
| <b>Daily step-count</b> |  |  |  |  |  |  |  |

Add up the steps from all 7 days to get total weekly step-count:

**Total weekly step-count =** \_\_\_\_\_

Divide the total weekly step-count by 7 to get average daily step-count:

**Average daily step-count =** \_\_\_\_\_

Did I achieve my goal? **Yes:** And my reward was.....

**No / Partly:** What got in the way? .....

# Physical Activity and Step-Count Diary

Week 12

Daily Step-Count goal \_\_\_\_\_

Weekly Step-Count goal \_\_\_\_\_



Use this diary to record any physical activities you do this week. This includes **walking** and **other physical activities** (e.g. cycling gardening, swimming, heavy housework, exercise classes etc). Write down the **approximate time** and **how long** you do them for.

|                         |  |  |  |  |  |  |  |
|-------------------------|--|--|--|--|--|--|--|
| <b>Date</b>             |  |  |  |  |  |  |  |
| <b>Day of week</b>      |  |  |  |  |  |  |  |
| <b>Morning</b>          |  |  |  |  |  |  |  |
| <b>Afternoon</b>        |  |  |  |  |  |  |  |
| <b>Evening</b>          |  |  |  |  |  |  |  |
| <b>Daily step-count</b> |  |  |  |  |  |  |  |

Add up the steps from all 7 days to get total weekly step-count:

**Total weekly step-count =** \_\_\_\_\_

Divide the total weekly step-count by 7 to get average daily step-count:

**Average daily step-count =** \_\_\_\_\_

Did I achieve my goal?

**Yes:** And my reward was.....

**No / Partly:** What got in the way? .....

# Physical Activity and Step-Count Diary

Week 13

Daily Step-Count goal \_\_\_\_\_

Weekly Step-Count goal \_\_\_\_\_

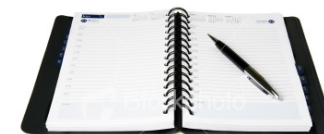

Use this diary to record any physical activities you do this week. This includes **walking** and **other physical activities** (e.g. cycling gardening, swimming, heavy housework, exercise classes etc). Write down the **approximate time** and **how long** you do them for.

|                         |  |  |  |  |  |  |  |
|-------------------------|--|--|--|--|--|--|--|
| <b>Date</b>             |  |  |  |  |  |  |  |
| <b>Day of week</b>      |  |  |  |  |  |  |  |
| <b>Morning</b>          |  |  |  |  |  |  |  |
| <b>Afternoon</b>        |  |  |  |  |  |  |  |
| <b>Evening</b>          |  |  |  |  |  |  |  |
| <b>Daily step-count</b> |  |  |  |  |  |  |  |

Add up the steps from all 7 days to get total weekly step-count:

**Total weekly step-count =** \_\_\_\_\_

Divide the total weekly step-count by 7 to get average daily step-count:

**Average daily step-count =** \_\_\_\_\_

Did I achieve my goal?

**Yes:** And my reward was.....

**No / Partly:** What got in the way? .....

# Physical Activity and Step-Count Diary

Week \_\_\_\_\_

Daily Step-Count goal \_\_\_\_\_

Weekly Step-Count goal \_\_\_\_\_

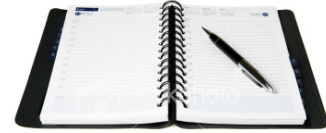

Use this diary to record any physical activities you do this week. This includes **walking** and **other physical activities** (e.g. cycling gardening, swimming, heavy housework, exercise classes etc). Write down the **approximate time** and **how long** you do them for.

|                         |  |  |  |  |  |  |  |
|-------------------------|--|--|--|--|--|--|--|
| <b>Date</b>             |  |  |  |  |  |  |  |
| <b>Day of week</b>      |  |  |  |  |  |  |  |
| <b>Morning</b>          |  |  |  |  |  |  |  |
| <b>Afternoon</b>        |  |  |  |  |  |  |  |
| <b>Evening</b>          |  |  |  |  |  |  |  |
| <b>Daily step-count</b> |  |  |  |  |  |  |  |

Add up the steps from all 7 days to get total weekly step-count:

**Total weekly step-count = \_\_\_\_\_**

Divide the total weekly step-count by 7 to get average daily step-count:

**Average daily step-count = \_\_\_\_\_**

Did I achieve my goal? **Yes:** And my reward was.....

**No / Partly:** What got in the way? .....

# Physical Activity and Step-Count Diary

Week \_\_\_\_\_

Daily Step-Count goal \_\_\_\_\_

Weekly Step-Count goal \_\_\_\_\_



Use this diary to record any physical activities you do this week. This includes **walking** and **other physical activities** (e.g. cycling gardening, swimming, heavy housework, exercise classes etc). Write down the **approximate time** and **how long** you do them for.

|                         |  |  |  |  |  |  |  |
|-------------------------|--|--|--|--|--|--|--|
| <b>Date</b>             |  |  |  |  |  |  |  |
| <b>Day of week</b>      |  |  |  |  |  |  |  |
| <b>Morning</b>          |  |  |  |  |  |  |  |
| <b>Afternoon</b>        |  |  |  |  |  |  |  |
| <b>Evening</b>          |  |  |  |  |  |  |  |
| <b>Daily step-count</b> |  |  |  |  |  |  |  |

Add up the steps from all 7 days to get total weekly step-count:

**Total weekly step-count = \_\_\_\_\_**

Divide the total weekly step-count by 7 to get average daily step-count:

**Average daily step-count = \_\_\_\_\_**

Did I achieve my goal? **Yes:** And my reward was.....

**No / Partly:** What got in the way? .....

# Physical Activity and Step-Count Diary

Week \_\_\_\_\_

Daily Step-Count goal \_\_\_\_\_

Weekly Step-Count goal \_\_\_\_\_



Use this diary to record any physical activities you do this week. This includes **walking** and **other physical activities** (e.g. cycling gardening, swimming, heavy housework, exercise classes etc). Write down the **approximate time** and **how long** you do them for.

|                         |  |  |  |  |  |  |  |
|-------------------------|--|--|--|--|--|--|--|
| <b>Date</b>             |  |  |  |  |  |  |  |
| <b>Day of week</b>      |  |  |  |  |  |  |  |
| <b>Morning</b>          |  |  |  |  |  |  |  |
| <b>Afternoon</b>        |  |  |  |  |  |  |  |
| <b>Evening</b>          |  |  |  |  |  |  |  |
| <b>Daily step-count</b> |  |  |  |  |  |  |  |

Add up the steps from all 7 days to get total weekly step-count:

**Total weekly step-count =** \_\_\_\_\_

Divide the total weekly step-count by 7 to get average daily step-count:

**Average daily step-count =** \_\_\_\_\_

**Did I achieve my goal?**      **Yes:** And my reward was.....

**No / Partly:** What got in the way? .....
